# Supplementary material for: Systematic Analysis of FASTK Gene Family Alterations in Cancer
Source: MDPI journal article supplement (doi:10.3390/ijms222111337), 2021-10-20
Supplement: s1 [file s1]

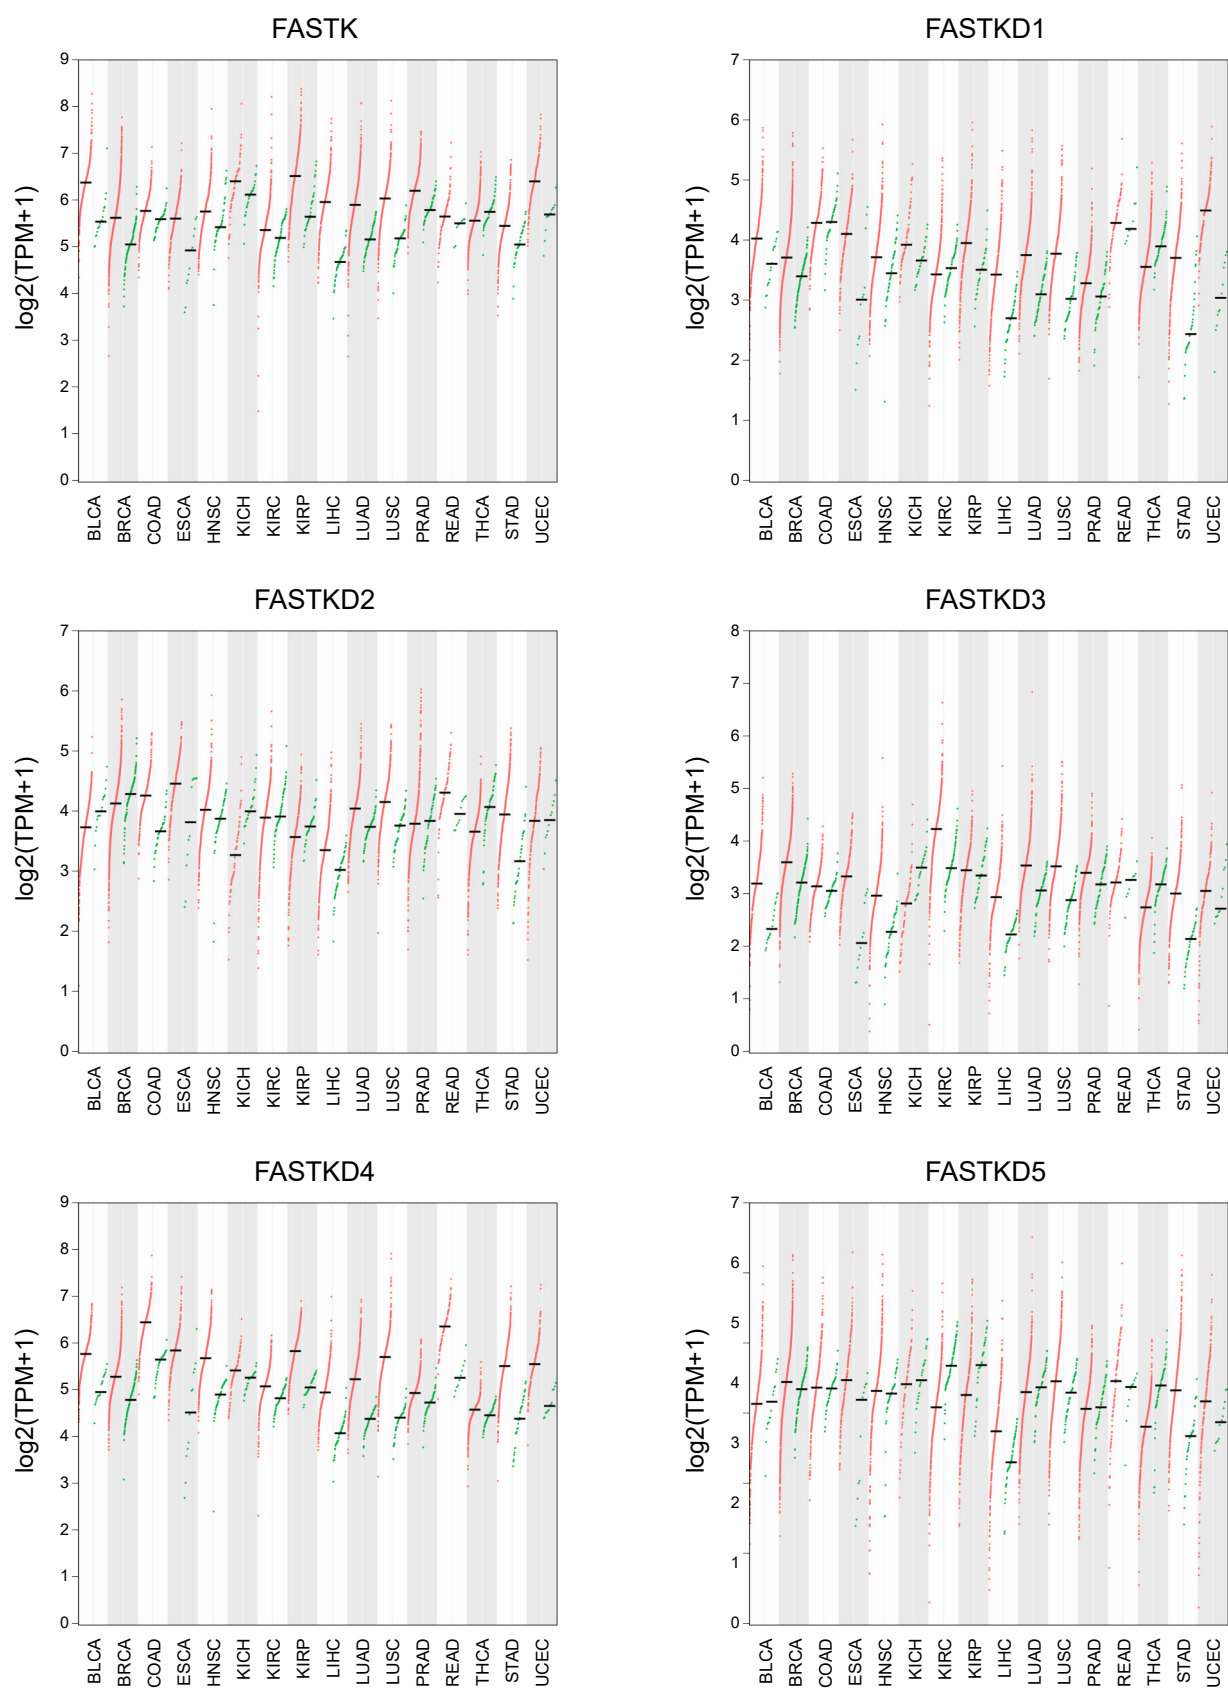

Figure S4. Expression of FASTK genes across 16 cancer types (red) and matched normal tissues (green) using GEPIA tool
