# Supplementary material for: Systematic Analysis of FASTK Gene Family Alterations in Cancer
Source: MDPI journal article supplement (doi:10.3390/ijms222111337), 2021-10-20
Supplement: s1 [file s1]

**Table S4. Topological parameters of the PPI network**

| Parameters                | Mean        |
|---------------------------|-------------|
| AverageShortestPathLength | 3.763396005 |
| BetweennessCentrality     | 0.015100522 |
| ClosenessCentrality       | 0.273714652 |
| ClusteringCoefficient     | 0.085340065 |
| Degree                    | 3.005405405 |
| Eccentricity              | 5.805405405 |
| NeighborhoodConnectivity  | 40.24580169 |
| Radiality                 | 0.605229143 |
| Stress                    | 5100.259459 |
| TopologicalCoefficient    | 0.132442709 |
