# Supplementary material for: Systematic Analysis of FASTK Gene Family Alterations in Cancer
Source: MDPI journal article supplement (doi:10.3390/ijms222111337), 2021-10-20
Supplement: s1 [file s1]

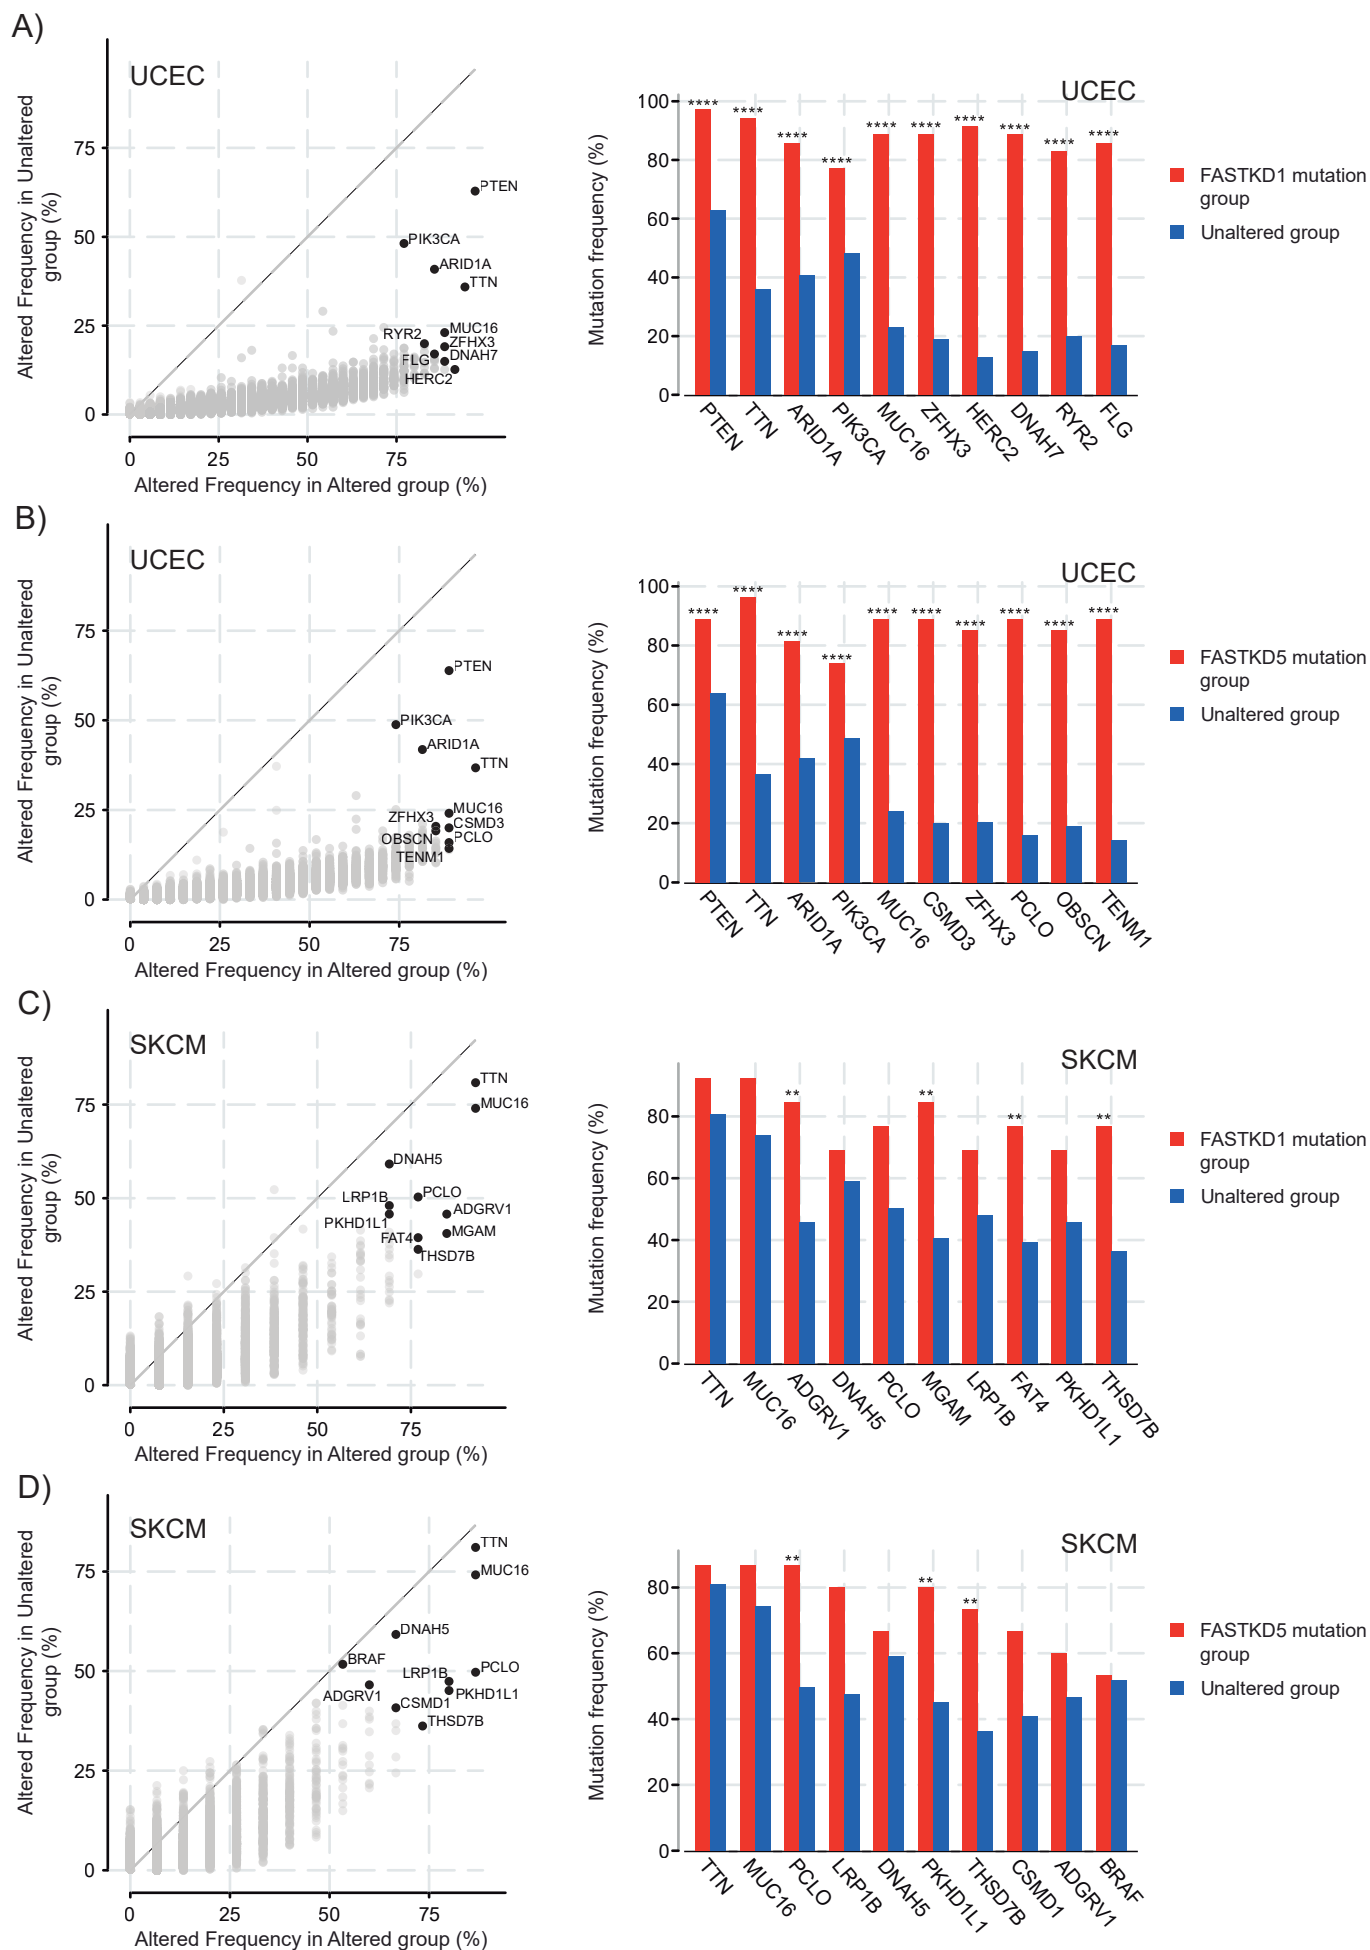

Figure S1: Co-occurrence mutation pattern of FASTKD1 (A,C) and FASTKD5 (B,D) and 10 genes with highest mutation frequency of each group in UCEC (A,B) and SKCM (C,D). \*\*  $p < 0.01$ ; \*\*\*\*  $P < 0.0001$
