# Supplementary material for: Systematic Analysis of FASTK Gene Family Alterations in Cancer
Source: MDPI journal article supplement (doi:10.3390/ijms222111337), 2021-10-20
Supplement: s1 [file s1]

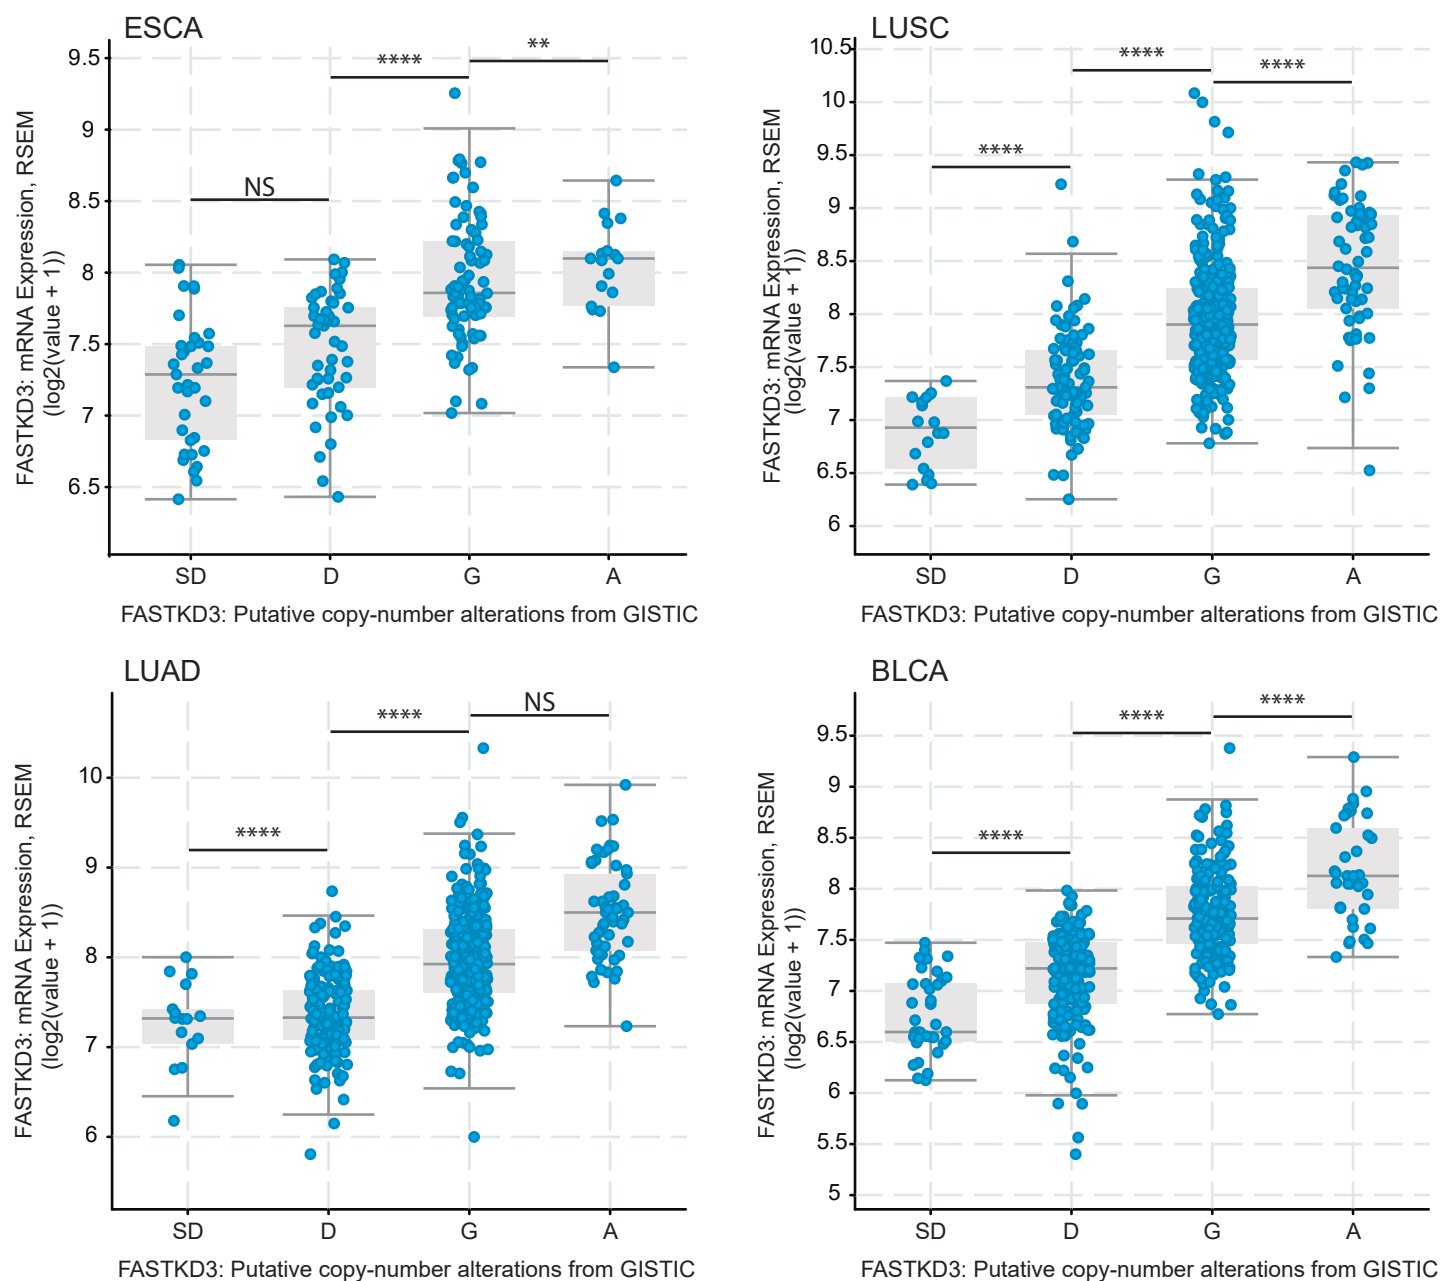

Figure S2. Correlation between FASTKD3 expression and CNAs in ESCA, LUSC, LUAD, and BLCA. DD, deep deletion; SD, shallow deletion; D, diploid; G, gain; A, amplification. NS, not significant; \*\* p<0.01; \*\*\*\* p<0.0001.
