# Supplementary material for: Systematic Analysis of FASTK Gene Family Alterations in Cancer
Source: MDPI journal article supplement (doi:10.3390/ijms222111337), 2021-10-20
Supplement: s1 [file s1]

**Table S3. List of cancer types, number of tumor and normal tissue samples, and statistical significance in the gene expression changes.**

| Abbreviation | Cancer type                                                      | Tumor | Normal | Statistical significance (gene expression) |                                            |                                         |                                            |                                            |                                            |
|--------------|------------------------------------------------------------------|-------|--------|--------------------------------------------|--------------------------------------------|-----------------------------------------|--------------------------------------------|--------------------------------------------|--------------------------------------------|
|              |                                                                  |       |        | FASTK                                      | FASTKD1                                    | FASTKD2                                 | FASTKD3                                    | TBRG4                                      | FASTKD5                                    |
| ACC          | Adrenocortical carcinoma                                         | 79    | 0      | n.a.                                       | n.a.                                       | n.a.                                    | n.a.                                       | n.a.                                       | n.a.                                       |
| AML          | Acute myeloid leukemia                                           | 173   | 0      | n.a.                                       | n.a.                                       | n.a.                                    | n.a.                                       | n.a.                                       | n.a.                                       |
| BLCA         | Bladder urotelial carcinoma                                      | 408   | 19     | <b><math>3.8 \times 10^{-12}</math></b>    | $5.3 \times 10^{-02}$                      | <b><math>7.9 \times 10^{-04}</math></b> | <b><math>1.7 \times 10^{-11}</math></b>    | <b><math>1.9 \times 10^{-12}</math></b>    | $6.8 \times 10^{-01}$                      |
| BRCA         | Breast invasive carcinoma                                        | 1097  | 114    | <b><math>1.6 \times 10^{-12}</math></b>    | <b><math>1.9 \times 10^{-08}</math></b>    | <b><math>1.5 \times 10^{-10}</math></b> | <b><math>1.1 \times 10^{-16}</math></b>    | <b><math>&lt; 1 \times 10^{-12}</math></b> | <b><math>1.9 \times 10^{-05}</math></b>    |
| CESC         | Cervical squamous cell carcinoma and endocervical adenocarcinoma | 305   | 3      | n.a.                                       | n.a.                                       | n.a.                                    | n.a.                                       | n.a.                                       | n.a.                                       |
| CHOL         | Cholangiocarcinoma                                               | 36    | 9      | n.a.                                       | n.a.                                       | n.a.                                    | n.a.                                       | n.a.                                       | n.a.                                       |
| COAD         | Colorectal adenocarcinoma                                        | 286   | 41     | <b><math>1.4 \times 10^{-03}</math></b>    | <b><math>6.5 \times 10^{-03}</math></b>    | <b><math>1.6 \times 10^{-12}</math></b> | <b><math>4.8 \times 10^{-03}</math></b>    | <b><math>&lt; 1 \times 10^{-12}</math></b> | $1.2 \times 10^{-02}$                      |
| DLBC         | Lymphoid Neoplasm Diffuse Large B-cell Lymphoma                  | 48    | 0      | n.a.                                       | n.a.                                       | n.a.                                    | n.a.                                       | n.a.                                       | n.a.                                       |
| ESCA         | Esophageal carcinoma                                             | 184   | 11     | <b><math>4.3 \times 10^{-05}</math></b>    | <b><math>4.7 \times 10^{-06}</math></b>    | <b><math>9.3 \times 10^{-03}</math></b> | <b><math>7.7 \times 10^{-08}</math></b>    | <b><math>5.7 \times 10^{-10}</math></b>    | <b><math>2 \times 10^{-03}</math></b>      |
| GBM          | Glioblastoma multiforme                                          | 156   | 5      | n.a.                                       | n.a.                                       | n.a.                                    | n.a.                                       | n.a.                                       | n.a.                                       |
| HNSC         | Head and neck squamous cell carcinoma                            | 520   | 44     | <b><math>1 \times 10^{-04}</math></b>      | $3.4 \times 10^{-02}$                      | <b><math>1.2 \times 10^{-03}</math></b> | <b><math>&lt; 1 \times 10^{-12}</math></b> | <b><math>&lt; 1 \times 10^{-12}</math></b> | <b><math>1.4 \times 10^{-03}</math></b>    |
| KICH         | Kidney Chromophobe carcinoma                                     | 67    | 25     | <b><math>8.5 \times 10^{-07}</math></b>    | <b><math>4.6 \times 10^{-04}</math></b>    | <b><math>3.9 \times 10^{-08}</math></b> | <b><math>5.8 \times 10^{-04}</math></b>    | <b><math>4.9 \times 10^{-08}</math></b>    | $2.6 \times 10^{-01}$                      |
| KIRC         | Kidney renal clear cell carcinoma                                | 533   | 72     | <b><math>1.2 \times 10^{-03}</math></b>    | <b><math>1.7 \times 10^{-12}</math></b>    | $1.7 \times 10^{-02}$                   | $5.5 \times 10^{-01}$                      | <b><math>7.5 \times 10^{-09}</math></b>    | <b><math>&lt; 1 \times 10^{-12}</math></b> |
| KIRP         | Kidney renal papillary cell carcinoma                            | 290   | 32     | <b><math>1.6 \times 10^{-12}</math></b>    | $9.7 \times 10^{-01}$                      | $1.1 \times 10^{-01}$                   | $5.8 \times 10^{-01}$                      | <b><math>1.6 \times 10^{-12}</math></b>    | <b><math>1.7 \times 10^{-04}</math></b>    |
| LGG          | Brain Lower Grade Glioma                                         | 513   | 0      | n.a.                                       | n.a.                                       | n.a.                                    | n.a.                                       | n.a.                                       | n.a.                                       |
| LIHC         | Liver hepatocellular carcinoma                                   | 371   | 50     | <b><math>1.6 \times 10^{-12}</math></b>    | <b><math>1.6 \times 10^{-12}</math></b>    | <b><math>1.6 \times 10^{-12}</math></b> | <b><math>&lt; 1 \times 10^{-12}</math></b> | <b><math>1.6 \times 10^{-12}</math></b>    | <b><math>1.6 \times 10^{-12}</math></b>    |
| LUAD         | Lung adenocarcinoma                                              | 515   | 59     | <b><math>1.6 \times 10^{-12}</math></b>    | <b><math>1.6 \times 10^{-12}</math></b>    | <b><math>3.3 \times 10^{-16}</math></b> | <b><math>1.6 \times 10^{-12}</math></b>    | <b><math>&lt; 1 \times 10^{-12}</math></b> | $1.1 \times 10^{-01}$                      |
| LUSC         | Lung squamous cell carcinoma                                     | 503   | 52     | <b><math>&lt; 1 \times 10^{-12}</math></b> | <b><math>&lt; 1 \times 10^{-12}</math></b> | <b><math>2.1 \times 10^{-13}</math></b> | <b><math>&lt; 1 \times 10^{-12}</math></b> | <b><math>&lt; 1 \times 10^{-12}</math></b> | <b><math>3 \times 10^{-12}</math></b>      |
| MESO         | Mesothelioma                                                     | 87    | 0      | n.a.                                       | n.a.                                       | n.a.                                    | n.a.                                       | n.a.                                       | n.a.                                       |
| OV           | Ovarian serous cystadenocarcinoma                                | 305   | 0      | n.a.                                       | n.a.                                       | n.a.                                    | n.a.                                       | n.a.                                       | n.a.                                       |
| PAAD         | Pancreas adenocarcinoma                                          | 178   | 4      | n.a.                                       | n.a.                                       | n.a.                                    | n.a.                                       | n.a.                                       | n.a.                                       |
| PCPG         | Pheochromocytoma and paraganglioma                               | 179   | 3      | n.a.                                       | n.a.                                       | n.a.                                    | n.a.                                       | n.a.                                       | n.a.                                       |
| PRAD         | Prostate adenocarcinoma                                          | 497   | 52     | <b><math>1.6 \times 10^{-12}</math></b>    | $6.4 \times 10^{-01}$                      | <b><math>1.2 \times 10^{-03}</math></b> | <b><math>2.3 \times 10^{-08}</math></b>    | <b><math>5.7 \times 10^{-09}</math></b>    | $6.5 \times 10^{-01}$                      |
| READ         | Rectal adenocarcinoma                                            | 166   | 10     | <b><math>1.5 \times 10^{-05}</math></b>    | $4.3 \times 10^{-02}$                      | <b><math>7.8 \times 10^{-03}</math></b> | $7.9 \times 10^{-01}$                      | <b><math>1.6 \times 10^{-12}</math></b>    | $8.4 \times 10^{-02}$                      |
| SARC         | Sarcoma                                                          | 260   | 2      | n.a.                                       | n.a.                                       | n.a.                                    | n.a.                                       | n.a.                                       | n.a.                                       |
| SKCM         | Skin cutaneous melanoma                                          | 472   | 1      | n.a.                                       | n.a.                                       | n.a.                                    | n.a.                                       | n.a.                                       | n.a.                                       |
| STAD         | Stomach adenocarcinoma                                           | 415   | 34     | <b><math>2 \times 10^{-04}</math></b>      | <b><math>7.2 \times 10^{-14}</math></b>    | <b><math>1 \times 10^{-12}</math></b>   | <b><math>&lt; 1 \times 10^{-12}</math></b> | <b><math>1.6 \times 10^{-12}</math></b>    | <b><math>&lt; 1 \times 10^{-12}</math></b> |
| TGCT         | Testicular Germ Cell Tumors                                      | 150   | 0      | n.a.                                       | n.a.                                       | n.a.                                    | n.a.                                       | n.a.                                       | n.a.                                       |
| THCA         | Thyroid carcinoma                                                | 505   | 59     | <b><math>2.3 \times 10^{-03}</math></b>    | <b><math>1.6 \times 10^{-12}</math></b>    | <b><math>1.6 \times 10^{-12}</math></b> | <b><math>6.9 \times 10^{-10}</math></b>    | <b><math>6.4 \times 10^{-07}</math></b>    | <b><math>1.6 \times 10^{-12}</math></b>    |
| THYM         | Thymoma                                                          | 120   | 2      | n.a.                                       | n.a.                                       | n.a.                                    | n.a.                                       | n.a.                                       | n.a.                                       |
| UCEC         | Uterine Corpus Endometrial Carcinoma                             | 546   | 35     | <b><math>3.2 \times 10^{-09}</math></b>    | <b><math>4.9 \times 10^{-11}</math></b>    | <b><math>7.6 \times 10^{-05}</math></b> | $2.9 \times 10^{-01}$                      | <b><math>1.6 \times 10^{-12}</math></b>    | <b><math>1.1 \times 10^{-10}</math></b>    |
| UCS          | Uterine Carcinosarcoma                                           | 57    | 0      | n.a.                                       | n.a.                                       | n.a.                                    | n.a.                                       | n.a.                                       | n.a.                                       |
| UVM          | Uveal Melanoma                                                   | 80    | 0      | n.a.                                       | n.a.                                       | n.a.                                    | n.a.                                       | n.a.                                       | n.a.                                       |

Statistically significant p-values are in bold.
